# Supplementary material
Source: Elsevier journal article supplement (https://www.sciencedirect.com/science/article/pii/S0210570520301400)
Supplement: mmc1 [file S0210570520301400:mmc1.docx]

**Tabla Suplementaria 1.** Estrategia de búsqueda y lista de sociedades científicas e instituciones consultadas.

| **Búsqueda Pubmed**  ("SARS-CoV2"[All Fields] OR "Viral pneumonia"[All Fields] OR "COVID-19"[All Fields] OR "Coronavirus"[All Fields] OR "Coronavirus 2"[All Fields] OR "SARS"[All Fields] OR "severe acute respiratory syndrome coronavirus 2"[Supplementary Concept] OR "severe acute respiratory syndrome coronavirus 2"[All Fields] OR "sars cov 2"[All Fields]) AND ("Endoscopy"[All Fields] OR "Endoscopies"[All Fields] OR "Gastrointestinal endoscopy"[All Fields] OR "Colonoscopy"[All Fields] OR "esophagogastroduodenoscopy"[All Fields] OR "gastroscopy"[All Fields] OR "Endoscopic ultrasound"[All Fields] OR "ERCP"[All Fields])  **Resultado:** 65 referencias |
| --- |
| **Cochrane Database of Systematic Reviews**  #1 - (SARS-CoV2) OR (Coronavirus) OR (COVID-19)  **Resultado:** 18 referencias |
| **Embase**  ('coronavirus'/exp OR coronavirus OR 'covid 19' OR 'sars cov2':au) AND (endoscopy OR gastroscopy OR ercp OR endoscopie OR ultrasound OR colonoscopy OR esophagogastroduodenoscopy)  **Resultado:** 77 referencias |
| **Lista de sociedades científicas e instituciones cuyas recomendaciones fueron revisadas con fecha 17/04/2020**  American Society of Gastrointestinal Endoscopy  American College of Gastroenterology  American Gastroenterology Association  British Society of Gastroenterology  European Society of Gastrointestinal Endoscopy  Ministerio de Sanidad, Consumo y Bienestar Social  Japanese Society of Gastrointestinal Endoscopy  Asian Pacific Society for Digestive Endoscopy  World Health Organization  Centre for Disease Control and Prevention  European Centre for Disease Prevention and Control  United European Gastroenterology  Sociedad Española de Medicina Preventiva, Salud Pública e Higiene  World Endoscopy Organization |
