# Supplementary material
Source: Elsevier journal article supplement (https://www.sciencedirect.com/science/article/pii/S0210570520301400)
Supplement: mmc2 [file S0210570520301400:mmc2.xlsx]

## Sheet: Priorización Endoscopias
CÓDIGO DE PRIORIDAD (ver leyenda a la derecha)	1	2	3	4	5	6	ASISTENCIA TELEMÁTICA RECOMENDADA
	ALTA	MEDIA	BAJA	DEMORABLE (rango 6 - 12 meses)	SEGUIMIENTOS PROGRAMADOS	SUSPENDER / REEVALUAR NECESIDAD
GASTROSCOPIA
Hallazgos radiológicos de alta sospecha de neoplasia o estenosis	1
Por síntomas
Disfagia u odinofagia graves o rápidamente progresivas	1
Disfagia de duración superior a 6 meses o no progresiva		2
Dispepsia o ERGE con signos / síntomas de alarma (pérdida de peso, anorexia, anemia...) o edad > 55 años	1
Dispepsia o ERGE persistente a pesar de tratamiento adecuado y > 6 meses de evolución, sin síntomas de alarma			3	4
Dispepsia persistente con antecedentes familiares de primer grado de cáncer gástrico sin síntomas de alarma		2
Dolor torácico no cardiogénico			3
Pérdida de peso de origen no filiado	1
Anemia ferropénica de origen no filiado		2
Síntomas abdominales altos inespecíficos sin síntomas de alarma y > 6 meses de evolución			3	4
Síntomas abdominales inespecíficos sin síntomas de alarma de inicio reciente			3
Vómitos persistentes con sospecha clínica de origen neoplásico	1
Vómitos persistentes SIN sospecha clínica de origen neoplásico		2
Resto de indicaciones
Enfermedades en las que una patología GI puede modificar la actitud terapéutica (p.e. historia de ulcus en pacientes que precisan iniciar tratamiento anticoagulante)	1
Tratamiento complicaciones post-quirúrgicas (dehiscencia de sutura) con terapia de vacio, prótesis, suturas…	1									LEYENDA
Tratamiento paliativo estenosis neoplásica	1									1	PRIORIDAD 1	ALTA
Colocación de gastrostomía endoscópica	1									2	PRIORIDAD 2	MEDIA
Control de cicatrización de ulcus gástrico		2								3	PRIORIDAD 3	BAJA
Esofagitis grado C / D de L.A. (descartar complicaciones)			3	4						4	PRIORIDAD 4	DEMORABLE (hasta 6 - 12 meses)
Episodios previos de impactación alimentaria (estudio etiológico)		2								5	PRIORIDAD 5	SEGUIMIENTOS PROGRAMADOS
Esofagitis eosinofílica. Evaluación de respuesta terapéutica			3							6	PRIORIDAD 6	SUSPENDER / REEVALUAR NECESIDAD
Revisión programada de gastrostomía endoscópica			3	4
Ligadura de VE en pacientes para profilaxis secundaria tras un episodio de HDA reciente	1
Ligadura de VE tras >=1 ligadura previa hasta completar erradicación		2
Ligadura de VE en pacientes para profilaxis primaria que no toleran o con contraindicación para los betabloqueantes		2
Seguimiento post erradicación VE o VG			3	4
Inyección de esclerosantes en pacientes con VG como profilaxis secundaria tras episodio de HDA reciente	1
Comprobación de erradicación de VG tratadas con adhesivos tisulares		2
Dilatación endoscópica de estenosis benignas	1
Terapéutica (RME o DSE) de neoplasia esofágica, gástrica precoz o lesiones con displasia visible en esófago de Barrett	1
Terapéutica (RME o DSE) de adenomas duodenales		2
Terapéutica de TNE tipo I < 20 mm		2
Inlet patches (heterotopia gástrica en esófago cervical)						6	7
Línea Z irregular o epitelio columnar con o sin MI de < 1 cm de longitud						6	7
Seguimiento Esófago de Barrett post-radiofrecuencia		2		4
Seguimiento Esófago de Barrett tras resección endoscópica de lesión visible (detectar lesión residual o recurrencia)		2
Seguimiento esófago de Barrett con histología indeterminada para displasia después de tratamiento con IBP para re evaluación			3
Seguimiento de esófago de Barrett sin displasia				4	5
Seguimiento de esófago de Barrett sin displasia y edad > 75 años (valorar extender a 80 años caso por caso)						6	7
Reevaluación de paciente con lesiones preneoplásicas del TGI alto remitidos desde otros Centros		2
Estudio hipertensión portal para descartar VE o VG en pacientes con datos de riesgo de fibrosis hepática avanzada			3
Tratamiento angiodisplasia o GAVE sintomático	1
Polipectomía gástrica en paciente con anemia o antecedente HDA sin otra causa	1
Diverticulotomía de Zenker sin antecedentes previos de broncoaspiración			3	4
Diverticulotomía de Zenker con antecedentes previos de broncoaspiración		2
Tratamiento de acalasia con dilatación o toxina botulínica, sin repercusión clínica importante		2
Tratamiento de acalasia con dilatación o toxina botulínica, con repercusión clínica importante	1
Biopsias previas de mucosa gástrica con >=DAG sin lesión visible	1
Biopsias previas de mucosa gástrica con displasia <= DBG sin lesión visible en una única gastroscopia previa		2
Biopsias previas de mucosa gástrica con displasia <= DBG sin lesión visible en > 1 gastroscopia previa			3	4
Seguimiento de gastritis atrófica antral sin MI						6
Seguimiento de gastritis atrófica antral con MI solo en antro o cuerpo, sin AF de CG, sin MI incompleta, sin gastritis tipo A ni infección H pylori persistente						6
Seguimiento de gastritis atrófica antral con MI solo en antro o cuerpo, con AF de CG, MI incompleta, gastritis tipo A o infección H pylori persistente				4	5
Seguimiento de MI / atrofia gástrica sin displasia después de resección de lesión visible					5
Seguimiento de MI / atrofia gástrica corporoantral sin displasia y sin antecedentes familiares CG				4	5
Seguimiento de MI / atrofia gástrica sin displasia CON antecedentes familiares CG					5
Seguimiento de lesiones preneoplásicas en TGI alto en pacientes de > 80 años con esperanza de vida < 10 años o pobre situación basal						6
Seguimiento tras terapéutica mediante RME o DSE para descartar lesión residual o recidiva con histología previa <= DBG			3	4
Seguimiento tras terapéutica mediante RME o DSE para descartar lesión residual o recidiva con histología previa >= DAG		2		4
Sospecha malabsorción / celiaquía o confirmación tras serología celiaquía positiva		2
Tratamiento acalasia con POEM			3	4
Diarrea crónica en estudio			3	4
Polipectomía gástrica en paciente asintomático y lesión de < 20 mm no sugestiva de neoplasia gástrica precoz			3	4
Síndromes hereditarios de CCR para descartar neoplasias gástricas asociadas (PAF, Peutz Jeghers) sin gastroscopia previa			3	4
Síndromes hereditarios de CCR para descartar neoplasias gástricas asociadas (PAF, Peutz Jeghers) con gastroscopia previa				4	5
Estudio de cáncer gástrico familiar sin gastroscopia previa			3	4
Estudio de cáncer gástrico familiar con gastroscopia previa				4	5
Seguimiento de pólipos gástricos hiperplásicos no resecados			3	4
Seguimiento por pólipos de glándulas fúndicas SIN síndromes hereditarios de neoplasia digestiva, ulceración o datos de sospecha de malignidad						6
Seguimiento de lesiones subepit gástricas previamente diagnosticadas de lipoma, leiomioma o páncreas aberrante						6	7
Seguimiento tras resección de TNE tipo I < 20 mm			3	4
Seguimiento por linfoma MALT de bajo grado, tras erradicación de H. pylori			3	4
USE
Estadificación neoplasias tubo digestivo alto	1
Estadificación colangiocarcinoma intrahepático	1
Drenaje pseudoquistes y colecciones pancreáticas en paciente con clínica	1
PAAF de lesiones focales sólidas de páncreas	1
PAAF de adenopatías en contexto de neoplasia	1
Dilatación de la vía biliar e ictericia	1
PAAF de probable neoplasia de la vía biliar	1
Sospecha de linitis plástica en estómago	1
Coledocogastrostomía o coledocoduodenostomía guiada por USE	1
Drenaje de la vesicula biliar por USE	1
PAAF de glándula suprarrenal patológica	1
Estudio de posible Dieulafoy	1
Sospecha de tumor neuroendocrino pancreático		2
PAAF de probable recidiva neoplásica		2
Estudio de coledocolitiasis post- pancreatitis aguda		2
Estudio probable ampuloma		2
Gastroenteroanastomosis guiada por USE	1
Estudio +/- PAAF de lesiones quísticas pancreáticas únicas de reciente diagnóstico con signos de riesgo por técnicas de imagen		2
Estudio +/- PAAF de lesiones subepiteliales gástricas > 3 cm			3
Primer control linfoma gástrico MALT tras tratamiento			3
Estudio pancreatitis idiopática			3
Estudio pancreatitis recurrente			3
Estudio tras resección endoscópica de neoplasia rectal pT1			3
Evaluación del nivel de invasión previo a resección endoscópica de neoplasia del TGI alto o recto con sospecha de invasión submucosa			3
Estudio TNE de pared del tubo digestivo previo a resección endoscópica			3
Estudio compresión extrínseca			3
Estudio dilatación conducto de Wirsung			3
Estudio dilatación vía biliar en paciente asintomático			3
Cribado de VG			3
Estudio de probable NMPI de conducto principal sin signos de riesgo por técnicas de imagen		2
Estudio de probable NMPI de conducto secundario sin signos de riesgo por técnicas de imagen			3
Estudio +/- PAAF de lesiones quísticas pancreáticas únicas de reciente diagnóstico sin signos de riesgo por técnicas de imagen			3	4
Estudio +/- PAAF de lesiones subepiteliales gástricas < 3 cm			3	4
Estudio probable pancreatits crónica			3	4
Control linfoma gástrico MALT (controles previos negativos)			3	4
Cribado de neoplasia de páncreas en población de riesgo			3	4
Estudio lesión subepitelial esofágica			3	4
Estudio lesión subepitelial duodenal			3	4
Seguimiento NMPI ya conocida			3	4
Estudio +/- PAAF de lesiones quísticas pancreáticas en pacientes no candidatos a cirugía por edad o comorbilidades						6
Estudio de lesiones subepiteliales < 3 cm en pacientes de edad avanzada o no candidatos a cirugía por comorbilidades						6
CPRE
Ampulectomía		2
Coledocolitiasis < 10 mm sin colangitis		2
Coledocolitiasis > 10 mm sin colangitis	1
Sospecha de disfunción del esfínter de Oddi			3
Retirada de prótesis biliar migrada proximalmente sin colangitis	1
Recambio / retirada programada de prótesis biliar			3
Colangioscopia intraductal por patología benigna		2
Terapéutica en pancreas divisum	1
Estudio de pancreatitis recurrente		2
Terapéutica de estenosis pancreática	1
Litiasis pancreáticas no impactadas y/o de < 5 mm		2
CÁPSULA ENDOSCÓPICA
Anemia con origen en ID / NO requerimientos transfusionales/ Respuesta a hierro oral-ev /No signos alarma/ Hb>10			3
Anemia con origen en ID / NO requerimientos transfusionales/Hb<10		2
Anemia con origen en ID/ SI requerimientos transfusionales frecuentes/Mayor o igual 65 años/ Anticoagulado/Insuf renal-Cardiopatía/Repercusión hemodinámica	1
Anemia con origen en ID/ SI requerimiento transfusional puntual/Mayor o igual 65 años/ Anticoagulado/Insuf renal-Cardiopatía/ No repercusión hemodinámica		2
Anemia con origen en ID/ SI requerimientos transfusionales frecuentes/Menor 65 años/No patología asociada	1
Anemia con origen en ID/ SI requerimiento transfusional puntual/Menor 65 años/No factores riesgo			3
Paciente con EII: Estudio de extensión			3
Paciente con EII: sintomático y no respuesta a tratamiento médico habitual		2
Sospecha de EII y síntomas leves			3
Sospecha de EII y síntomas moderado-graves		2
Seguimiento Sd Lynch			3	4
Seguimiento Sd. Peutz-Jeghers			3	4
ENTEROSCOPIA
Lesión MG en ID en prueba de imagen Rx y/0 CE (confirmación histológica o tatuaje)	1
Lesión no MG diagnosticada por CE. Confirmación histológica		2
Lesiones vasculares en CE/ NO requerimientos transfusionales/ Respuesta a hierro oral-ev			3
Lesiones vasculares en CE/ SI requerimiento transfusional/Mayor o igual 65 años/ Anticoagulado/Insuf renal-Cardiopatía/ No repercusión hemodinámica		2
Lesiones vasculares en CE/ SI requerimiento transfusional/Mayor o igual 65 años/ Anticoagulado/Insuf renal-Cardiopatía/ SI repercusión hemodinámica	1
Estenosis ID paciente con EII (enteroRM previa)/ síntomas leves		2
Estenosis ID paciente con EII (enteroRM previa)/ síntomas moderados-graves	1
Sesiones dilatación periódicas en paciente con EII (tras primera dilatación no efectiva)	1
Anemia crónica con sospecha de origen en ID/ NO requerimiento transfusional/CE previa sin lesiones			3	4
COLONOSCOPIA
Por síntomas^
Ferropenia sin anemia con gastroscopia sin lesiones		2
Anemia ferropénica en < 50 años sin FR de CCR*			3
Anemia ferropénica en >= 50 años o con FR de CCR SIN colonoscopia previa (últimos 5 años)	1
Anemia ferropénica en >= 50 años o con FR de CCR CON colonoscopia previa (últimos 5 años)			3
Rectorragia / hematoquecia (sin EII) en >= 50 años estable hemodinámicamente sin FR de CCR			3
Rectorragia / hematoquecia (sin EII) en >=50 años estable hemodinámicamente con FR de CCR, sin colonoscopia previa	1
Rectorragia / hematoquecia (sin EII) en >=50 años estable hemodinámicamente con FR de CCR, con colonoscopia previa			3	4
Rectorragia / hematoquecia (sin EII) en < 50 años estable hemodinámicamente sin FR de CCR			3
Estreñimiento crónico / Distensión abdominal / Dolor abdominal en > 50 años con EEI, anemia, SOH+ o FR de CCR		2
Estreñimiento crónico / Distensión abdominal / Dolor abdominal en >= 50 años sin EEI, sin anemia, sin SOH+ ni FR de CCR			3
Estreñimiento crónico / Distensión abdominal / Dolor abdominal en < 50 años sin EEI, sin anemia, sin SOH+ ni FR de CCR			3	4		6
Diarrea crónica sin EII, malabsorción, origen infeccioso, anemia, sangrado, FR de CCR, ni VIH, sin colonoscopia previa con biopsias			3
Cambio del ritmo intestinal de reciente comienzo en >= 50 años	1
Cambio del ritmo intestinal de reciente comienzo en < 50 años		2
Resto de indicaciones
Cribado poblacional de CCR (>= 50 años, asintomático y con TSOH-i +)$	1
Sospecha de CCR por prueba de imagen o exploración física	1
Sospecha de CCR por criterios clínicos (Guía NICE 2015 actualizada en 2017**) sin TSOH-i realizado		2
Estudio tras episodio de diverticulitis aguda no complicada						6	7
Estudio tras episodio de diverticulitis aguda complicada o con diagnóstico incierto		2
Alta sospecha clínica de EII	1
Evaluación de extensión de EII (excluido cribado de displasia) sin colonoscopia previa	1
Evaluación de actividad de EII (excluido cribado de displasia) sin colonoscopia previa reciente o deterioro clínico	1
Evaluación de actividad de EII (excluido cribado de displasia) con colonoscopia previa reciente y buen control clínico			3	4
Sospecha de recidiva en anastomosis postquirúrgica en paciente con EII	1
Cribado de displasia en paciente con EII (riesgo alto***) sin colonoscopia previa o en vigilancia			3	4
Cribado de displasia en paciente con EII (riesgo intermedio y bajo***) sin colonoscopia previa			3	4
Cribado de displasia en paciente con EII (riesgo intermedio o bajo***) con colonoscopia previa					5
Vigilancia de pólipos de colon: <= 4 lesiones con DBG y < 10 mm						6	7
Vigilancia de pólipos de colon: >= 1 lesión avanzada**** o >= 3 adenomas no avanzados				4	5
Lesión serrada sin displasia < 10 mm o cualquier número de pólipos serrados en recto-sigma < 10 mm						6	7
Evaluación tras resección fragmentada de >= 1 lesión de >= 20 mm			3
CCR pT1 a resecado endoscópicamente sin FR de MTS linfática			3	4
CCR intervenido quirúrgicamente (protocolo de vigilancia que comienza al año de la cirugía)			3	4
Seguimiento de adenomas en > 80 años (o > 75 años con comorbilidad)						6	7
Cribado por antecedentes de CCR en 1 familiar de primer grado o >= 1 familiares de segundo o tercer grado						6	7
Cribado por antecedentes de CCR en >= 2 familiares de primer grado			3	4
Sd hereditario de CCR, asintomático, sin colonoscopia previa			3
Vigilancia en Sd Lynch			3	4
Vigilancia en Sd CCR tipo X				4	5
Vigilancia en Sd. polipósicos			3	4
Vigilancia de Síndrome de Poliposis serrada con <5 pólipos, ningun adenoma avanzado o pólipo serrado avanzado en colono previa			3	4
Seguimiento de lesiones preneoplásicas CR en pacientes de > 80 años con esperanza de vida < 10 años o pobre situación basal						6	7
Resección compleja (RME o UEMR) de lesiones con baja probabilidad de neoplasia avanzada por diagnóstico óptico		2
Resección compleja (RME, UEMR, RTME o DSE) de lesiones con alta probabilidad de neoplasia avanzada por diagnóstico óptico*****	1
Terapéutica de estenosis de colon (cualquier etiología) sin obstrucción	1
Colocación de endoprótesis con intención paliativa	1
^Se valorará, en función de la disponibilidad local o posible inconveniencia para los pacientes, la realización previa de TSOH-i para reasignar el nivel de prioridad.
$ Se recomienda ajustar prioridad en función de edad, sexo y resultado cuantitativo del TSOH-i
*Antecedentes personales de CCR, adenomas o EII O Antecedentes familiares de primer grado con CCR o adenomas avanzados o Sd. hereditario de CCR
**https://www.nice.org.uk/guidance/ng12/chapter/1-Recommendations-organised-by-site-of-cancer#lower-gastrointestinal-tract-cancers
***Riesgos de CCR en pacientes con EII (CU, EC de colon y colitis indeterminada a los 8 años del inicio de los síntomas o al cumplir 50 o más años de edad, con independencia de la duración de la EII.) Alto riesgo: colitis extensa con actividad grave o estenosis o displasia en últimos 5 años o anteced. fam. de CCR< 50 años o CEP asociada. Riesgo medio: colitis extensa con actividad leve o moderada…
****Lesión avanzada: Adenoma >= 10 mm, componente velloso o DAG. Lesión serrada >= 10 mm o con displasia.
*****Alta probabilidad de neoplasia avanzada por diagnóstico óptico: patrón Vi de Kudo o NICE 2B o Sano IIIA o non-lifting o componente deprimido (0-IIc)
